# Supplementary material
Source: publisher figshare collection journal article supplement (https://plos.figshare.com/articles/dataset/_/1599651)
Supplement: Supplementary file [file 1]

S3- IDI – rural analysis summary

| CD     | Causes                                                         | Signs and symptoms                                                                          | Treatment type                                                    |
|--------|----------------------------------------------------------------|---------------------------------------------------------------------------------------------|-------------------------------------------------------------------|
| Asthma | If one was not covered very well while he/she was young        | wheezing                                                                                    | Herbalists                                                        |
| Asthma | smoking cigarettes and sharing cups                            | difficulties in breathing                                                                   | herbal                                                            |
| Asthma | very bad chest infection that is not well treated              | cough all the time, even when the cold comes they suffocate                                 |                                                                   |
| Asthma |                                                                | Eyes become very white and glittery<br><br>when it is rainy, they have to cover themselves  | traditionalists boil herbs, medical treatment                     |
| Asthma |                                                                | get difficulties in breathing                                                               | Garlic, Medical treatment                                         |
| Asthma | it is hereditary                                               | Falling down<br><br>difficulty in breathing                                                 | Medical, herbal but does not heal completely                      |
| Asthma | It's genetic                                                   | Hardship in breathing                                                                       | Medical treatment                                                 |
| asthma | It's contagious (eating and drinking with and infected person) | breathing faster, his eyes turn red, and he loses peace of body, shivering, and other cough | Western, prayers doesn't help same applies to herbal medicine     |
| Asthma |                                                                | During cold weather you get suffocated in that you cannot breathe very well, whizzing on    | Go to hospital, herbalists, others are prayed for and get healed. |

|           |                                                               |                                                                                                                 |                                                                               |
|-----------|---------------------------------------------------------------|-----------------------------------------------------------------------------------------------------------------|-------------------------------------------------------------------------------|
|           |                                                               | your throat like the way a cat does                                                                             |                                                                               |
| Asthma    | In born                                                       | suffocate when it is cold,                                                                                      | Majority use herbs and very few go to hospitals.                              |
| asthma    |                                                               | gets difficulties in breathing during poor conditions like cold weather                                         | traditional medicine, western hospitals for treatment                         |
| Asthma    |                                                               | person gets difficulties in breathing during the cold conditions                                                | Herbalists , prayers, western                                                 |
| asthma    |                                                               | patients normally are to sensitive to coldness, the patient will struggle to grasp breath, they become restless |                                                                               |
| Asthma/TB |                                                               | whizzing sound from the chest, coughs                                                                           | Western medicine                                                              |
| Diabetes  | drinking too much sugar, eating sweet things like sugar cane, | Fat, unable to run, have no strength                                                                            | Traditional healer claim to heal t but they don't, prayers                    |
| diabetes  | abnormally swollen                                            | Putting on weight or getting too fat things like that                                                           | boil flowers and drink, raw sugar mixed in water and you give him to drink up |

|          |                                                               |                                                                                                             |                                                                             |
|----------|---------------------------------------------------------------|-------------------------------------------------------------------------------------------------------------|-----------------------------------------------------------------------------|
|          |                                                               |                                                                                                             |                                                                             |
| diabetes | taking too much sugar                                         |                                                                                                             |                                                                             |
| diabetes | eating too much fat                                           | Some people swell feet                                                                                      | daily injections, tablets, Modern medicine                                  |
| diabetes | May be taking a lot of sugar or may be taking sweet beverages |                                                                                                             | Medical treatment,<br>No traditional medicine.                              |
| diabetes | taking sugar                                                  | feet swell, get pain in the feet as if they are stepping on thorns                                          | Medical treatment, herbal, others go for prayers but not sure if they heal. |
| Diabetes | using so much things a lot of salt or sugar                   | a skin irritation every time, swollen legs, joint pains                                                     | Medical treatment                                                           |
| diabetes | taking a lot of sugar, or eating very sweet foods             |                                                                                                             | Medical treatment, Some people go for prayers but don't get cured           |
| diabetes | eating sweet foods, taking too much sugar                     |                                                                                                             |                                                                             |
| Diabetes |                                                               | Sweating                                                                                                    | western                                                                     |
| Diabetes | Too much sugar or little sugar in the body.                   | the stomach swells, and diabetes leads a person to lose weight and another thing the hair can all get pale. | Western , traditional herbs                                                 |

|          |                                                                                 |                                                                                                                                |                                                                                                                               |
|----------|---------------------------------------------------------------------------------|--------------------------------------------------------------------------------------------------------------------------------|-------------------------------------------------------------------------------------------------------------------------------|
| diabetes |                                                                                 | his legs swell, his fingers swell, and his heart beats faster all the time, sweat a lot                                        |                                                                                                                               |
| diabetes | it is inherited                                                                 | most of the times they swell the feet, they sometimes also get sores in the soles of their feet and usually get fat            | Western, some go traditional healers but don't improve                                                                        |
| diabetes | eating sweet foods, taking a lot of sugar,<br><br>taking excessive salt         |                                                                                                                                |                                                                                                                               |
| diabetes |                                                                                 |                                                                                                                                |                                                                                                                               |
| diabetes | drinking too much sugar and alcohol, also eating raw salt, eating a lot of salt | a person is sick all the time and injects himself daily, forbidden not to eat thing like salt, sugar and drinks a lot of water | Medical treatment,<br><br>Traditional medicine but so sure about it., prayers at times patients are prayed for and get cured. |
| epilepsy |                                                                                 | falling down suddenly and produces saliva, discharging gasses                                                                  |                                                                                                                               |
| epilepsy | witchcraft, and others say it is inborn in a family                             | One falls down; they pass out gas and urinate.                                                                                 | when a person dies of epilepsy all their belongings are put on their                                                          |

|          |                                                |                                                                                      |                                                                                                                                                                                                                                          |
|----------|------------------------------------------------|--------------------------------------------------------------------------------------|------------------------------------------------------------------------------------------------------------------------------------------------------------------------------------------------------------------------------------------|
|          |                                                |                                                                                      | grave saying that someone might be infected with it also<br><br>Unless one has just got it that's when they can get cured but when they fall in fire and urinate on themselves it is said that one does not get cured. Western medicine. |
| epilepsy | Mental issues when things are not going right. | Falling down                                                                         | Western no traditional medicine that works                                                                                                                                                                                               |
| epilepsy | inherited in families                          | falls, they foam, and when they are recovering from the attack, they soil themselves | prayers                                                                                                                                                                                                                                  |
| epilepsy |                                                | falling down, produce saliva, urinates on himself .                                  | Medical treatment                                                                                                                                                                                                                        |
| epilepsy |                                                | feels dizzy all the time, they get an attack and fall down when a new moon comes,    |                                                                                                                                                                                                                                          |

|          |                             |                                                                                                   |                                                                                                          |
|----------|-----------------------------|---------------------------------------------------------------------------------------------------|----------------------------------------------------------------------------------------------------------|
|          |                             | other than falling down, convulsing, frothing while others vomit                                  |                                                                                                          |
| epilepsy | It's hereditary             | falls down and froths and they convulse,<br><br>the day she will get an attack, she is very weak  | medication from the health center                                                                        |
| epilepsy |                             | you he falls down, he produces foam in the mouth, looks unconscious                               | some people go to herbalists and get relieved<br><br>Medical treatment helps especially in early stages. |
| epilepsy | evil spirits.               | fall down, they froth, kicking around and get convulsions                                         | Western but majority go to traditional healing.                                                          |
| epilepsy | Poor blood flow in the body | fallen there and the eyes pop out and convulse                                                    | modern medicine,<br><br>traditional healers<br><br>prayers                                               |
| epilepsy |                             | falls down, he urinates on himself or emits saliva                                                | Western and herbalists                                                                                   |
| epilepsy | hereditary disease          | they fall and get stiff, saliva comes out of the mouth, and sometimes the eyes balls open so wide | Herbalists,<br><br>Western treatment                                                                     |

|                |                                                               |                                                                                                                |                               |
|----------------|---------------------------------------------------------------|----------------------------------------------------------------------------------------------------------------|-------------------------------|
| epilepsy       |                                                               | makes some sort of noise noise and then goes down, foam coming from the mouth, loses consciousness             |                               |
| epilepsy       |                                                               | falls down, urinating on himself, foams in the mouth, and a lot of tears come out until he gains consciousness |                               |
| Epilepsy       | if their saliva gets in contact with you, you also acquire it |                                                                                                                |                               |
| heart disease  | Worries due to many problems                                  | Shock and being scared                                                                                         |                               |
| heart disease  | smoking cigarettes                                            |                                                                                                                |                               |
| heart disease  | result of the fatty things we eat, worrying too much          | breathes so much, and their heart beat is faster                                                               | Prayers and western treatment |
| heart diseases |                                                               | whole body weak, difficulty in breathing, having excessive body fluids, respiratory functioning abnormally     |                               |
| heart failure  |                                                               |                                                                                                                | western                       |

|               |                                                                               |                                                           |                                                                                    |
|---------------|-------------------------------------------------------------------------------|-----------------------------------------------------------|------------------------------------------------------------------------------------|
| heart failure | Some veins of the heart being dead                                            |                                                           | traditional herbs,<br>western medicine                                             |
| Heart failure |                                                                               | stunted growth                                            |                                                                                    |
| heart failure | having a lot of thoughts                                                      |                                                           | Medical treatment                                                                  |
| heart failure | worried so much it makes the heart restless                                   |                                                           | Both western and traditional medicine. Some go for prayers.                        |
| heart failure |                                                                               | patient feels palpitations all the time                   | Western<br>Doesn't trust local medicine                                            |
| Heart problem | When someone does not drink a lot, when there insufficient water in the body. |                                                           | Eating sour eggplant (katunkuma), western medicine, eating green bitter vegetables |
| Heart problem |                                                                               | Palpitations of the heart are very high.                  | a person with heart problems is taken to India for an operation                    |
| HIV           | sexual intercourse                                                            | Frequent sickness, his hair color changes, his skin pales | western                                                                            |
| HIV           | Sexual contact with an infected person                                        | lose of weight, skin rash, red lips                       |                                                                                    |



|     |                                                                                                  |                                                                                                                                                                                                  |                                                               |
|-----|--------------------------------------------------------------------------------------------------|--------------------------------------------------------------------------------------------------------------------------------------------------------------------------------------------------|---------------------------------------------------------------|
| HIV |                                                                                                  | Constant fever, red lips, loss of weight , cough                                                                                                                                                 | Western medicine, traditional one doesn't work/ not effective |
| HIV | Unprotected Sexual intercourse, injections,                                                      | Frequent fever, cough, headache, diarrhoea                                                                                                                                                       | Medical treatment,<br>Prayers but doesn't confirm             |
| HIV | sexual intercourse with an infected person                                                       | got sick, grew thin,<br>herpes zoster but today, it no longer attacks,<br><br>, you just see a HIV positive person growing thin and since people take HIV treatment, he/she dies without notice. | Medical, herbalist help to get relieved but not cure          |
| HIV | Promiscuity, blood transfusion and unprotected sex.                                              | Lose weight, they can get running stomach, getting a skin rash, for some, their hair loses its texture and color.                                                                                | Medical treatment and are given ARV's, herbal medication      |
| HIV | having a sexual relation with a person who is infected without first knowing each other's status | skin rash, persistent cough, persistent fevers, the skin becomes pale, skin tend to change and their lips change to pink, complain of wounds in the mouth all the time                           | Medical treatment ,<br>herbal (kadamola),<br>prayers          |
| HIV | Extramarital sex and using unsterilized syringes                                                 | persistent fever for over a months, becomes weak, some people are noticed through their mouth, their lips crack, their                                                                           | Western , prayers relieve you of your thoughts,               |

|     |                                                                                                                                             |                                                                                                                                                                 |                                                                                    |
|-----|---------------------------------------------------------------------------------------------------------------------------------------------|-----------------------------------------------------------------------------------------------------------------------------------------------------------------|------------------------------------------------------------------------------------|
|     |                                                                                                                                             | bodies pale, they develop skin rashes and other are attacked by herpes zoster                                                                                   |                                                                                    |
| HIV | Having a sexual relation with any other person, Sharing sharp instruments like needles, safety pins and razor blades.                       | constant fevers, frequent cough, getting a skin rash including diarrhoea herpes zoster, reddish lips, decolorizing of the hair and eventually hair getting off. | Medical treatment though some few go for herbal treatment and traditional healing. |
| HIV |                                                                                                                                             | loses too much weight, they have skin rash, the lips become red, and the hair gets brown and some also get their stomachs swelling                              | traditional healers, medical treatment, miracle healing in the saved churches      |
| HIV | sexual intercourse without using a condom, razorblades and knives                                                                           | herpes zoster, loss of self-worth                                                                                                                               | You go for medical treatment, local/traditional medicine                           |
| HIV | Sexual intercourse between an infected and an uninfected person.<br><br>Shared things like injections, razor blades and other sharp things. | get herpes zoster, being bedridden,<br><br>suffering from many sickness at ago like flu, headache, chest pain/cough                                             |                                                                                    |

|               |                                                                                                                                                                                                                                                                                       |                                                                                                                                  |                                                                                 |
|---------------|---------------------------------------------------------------------------------------------------------------------------------------------------------------------------------------------------------------------------------------------------------------------------------------|----------------------------------------------------------------------------------------------------------------------------------|---------------------------------------------------------------------------------|
| HIV           | sexual intercourse with a person without using a condom,<br><br>if you have a wound or you get involved in an accident and your blood comes into contact, through other instruments like razor blades and safety pins and through the machines used in the hospitals to extract teeth | he may suffer from dry cough that does not heal, he may be attacked by herpes zoster, he may have diarrhoea and persistent fever | Medical treatment, other healers can't treat it instead worsening the condition |
| HIV           |                                                                                                                                                                                                                                                                                       | blood pressure comes down and become bed ridden and can't even come out of bed                                                   | Traditional medicine that are trying but it's not effective, prayers            |
| HIV           | Having sex without a condom with an infected person or sharing skin piercing instruments with an infected person such as a razor blades that can cause you get infected.                                                                                                              | Sores, boils, someone losing too much weight, become pale, some lose hair and it gets worn out.                                  | Western, prayers and traditional healers do not work to treat HIV.              |
| Lung          |                                                                                                                                                                                                                                                                                       |                                                                                                                                  | Western                                                                         |
| lung diseases | smoking cigarettes, smoking marijuana                                                                                                                                                                                                                                                 | Cheeks, arms and legs swell.                                                                                                     | Western,                                                                        |
| lung diseases | smoking the pipe, drinking alcohol                                                                                                                                                                                                                                                    | Difficulties in breathing                                                                                                        | Western, some go to traditional herbalists but don't get cured                  |

|                 |                                                                                                                         |                                                                     |                                                                                                                                                                                                                                        |
|-----------------|-------------------------------------------------------------------------------------------------------------------------|---------------------------------------------------------------------|----------------------------------------------------------------------------------------------------------------------------------------------------------------------------------------------------------------------------------------|
| Lung infection  | born with weak lungs, smoking cigarettes                                                                                | Un comfortable in breathing, coughing,                              | Medical treatment                                                                                                                                                                                                                      |
| Lung infection  | smoking cigarettes and taking alcohol                                                                                   | chest pain, pain inside and his heart would be restless ns,         |                                                                                                                                                                                                                                        |
| lung infections | one takes too much cigarettes, his lungs get holes and also taking a lot of hard alcohol (walagi kasese and cigarettes) |                                                                     |                                                                                                                                                                                                                                        |
| lung infections | Smoking cigarettes                                                                                                      | feel pain in the stomach and you discharge a bad smell              | Medical treatment                                                                                                                                                                                                                      |
| lungs disease   |                                                                                                                         |                                                                     |                                                                                                                                                                                                                                        |
| Pressure        | Much thought,                                                                                                           | Frightened, recurrent sickness, general weakness                    | Western traditional but don't believe it works, prayers                                                                                                                                                                                |
| pressure        | Being Worried                                                                                                           | Falling down, signs of diabetes are similar with those for pressure | go to hospital to be given tablets, and also reduce worrying, do not eat salt, traditional medicine Some say it is effective, others say it is not, prayers reduces it slowly , traditional medicine but western medicine works better |

|          |                                                                                                                            |                                                                                                     |                                                                                                          |
|----------|----------------------------------------------------------------------------------------------------------------------------|-----------------------------------------------------------------------------------------------------|----------------------------------------------------------------------------------------------------------|
| Pressure | eating very fatty foods                                                                                                    | Get startled and fall down                                                                          |                                                                                                          |
| Pressure | Thoughts or worries                                                                                                        | heavy breathing, sweating                                                                           | not to mistreat a person with pressure<br>Traditional herbs that are boiled                              |
| pressure | Don't know                                                                                                                 | Sweating,                                                                                           |                                                                                                          |
| pressure | getting worried, eating fried foods                                                                                        | Hears things making noise, it can make them feel bad, they get scared and fall down.                | Medical treatment and herbal                                                                             |
| pressure | Thinking too much, being worried                                                                                           | get a pain in the heart and they faint, fall down and faint, high palpitation of the heart          | Hospital for treatment, herbal medication                                                                |
| pressure | being fat, eating fatty foods Like meat, taking undiluted milk, drinking beers, eating fried foods every, eating raw salt. | Sweating ,<br>feel headache, feel aches in the ribs                                                 | western hospitals, traditional medicine to get relief. Some go for prayers but don't work for them.      |
| pressure |                                                                                                                            | very many thoughts, getting worried, become very fat and you are unable to walk, eating fatty foods | Both western and traditional especially those poor ones who can't afford to buy drugs from the hospital. |
| pressure | Eating fatty thing all the time, worries                                                                                   |                                                                                                     | modern medicine, traditional herbs                                                                       |

|          |                                                                                                                                                                        |                                                                                                |                                                                                                                                                                                                          |
|----------|------------------------------------------------------------------------------------------------------------------------------------------------------------------------|------------------------------------------------------------------------------------------------|----------------------------------------------------------------------------------------------------------------------------------------------------------------------------------------------------------|
| Pressure | Taking too much oil (fatty things), and having a lot of thoughts                                                                                                       | palpitations and sweat all the time                                                            | western hospitals,<br>local medicine                                                                                                                                                                     |
| pressure | when one has a lot of fat in their bodies                                                                                                                              | get paralyzed in some parts of their body                                                      | Getting away from noisy place to calm ones, not to eat fatty things , western treatment, traditional practitioners                                                                                       |
| pressure | stress like for example if you secured a loan from a bank,<br>getting frightened,<br>losing a very helpful person like a child or a parent,<br>lot of fats in the body | heart beats so fast, when he climbs a steep slope,<br>Any abrupt occurrence he gets frightened | Western, With prayers you get relieved of stress and when the stress reduces, pressure is also likely to heal,<br><br>Take lemon to help to reduce the fats, reducing on the consumption of fatty foods. |
| pressure |                                                                                                                                                                        | Sweating, BP level is higher                                                                   |                                                                                                                                                                                                          |
| pressure |                                                                                                                                                                        | a person sweats, very fat but these days even small ones get the blood pressure                |                                                                                                                                                                                                          |
