# Supplementary material
Source: publisher figshare collection journal article supplement (https://plos.figshare.com/articles/dataset/_/1599651)
Supplement: Supplementary file [file 1]

#### S4-IDI urban analysis summary

| CD                                    | causes                                                   | Signs and symptoms                                                         | Treatment type                                                                         |
|---------------------------------------|----------------------------------------------------------|----------------------------------------------------------------------------|----------------------------------------------------------------------------------------|
| Asthma                                | Smoking                                                  |                                                                            |                                                                                        |
| Asthma                                |                                                          | Struggles to breath                                                        | Western e.g. inhalers and local garlic and honey                                       |
| Asthma                                | Flu and cold conditions                                  | Difficulty in breathing during cold conditions                             |                                                                                        |
| Asthma                                |                                                          | Difficulty in breathing,                                                   | Western. Long diagnosis procedure discourage patients from continued treatment seeking |
| Asthma                                | Cold weather                                             | Difficulty in breathing, seizures, snoring                                 | Western (injections, inhalers)                                                         |
| Asthma                                | Genetic, sharing utensils, inhaling dirt                 |                                                                            | Western and local                                                                      |
| Asthma                                | Cat fur in the food                                      |                                                                            | Western and herbs                                                                      |
| Asthma                                |                                                          | Cough, feeling cold all the time                                           | Western                                                                                |
| Asthma                                | Walking in the cold, environments                        |                                                                            |                                                                                        |
| Asthma, TB COPD: all affect the lungs | Cigarettes                                               | Slim, breathes like a cat, cough, heavy breathing                          | Herbs, western and prayers                                                             |
| Asthma, TB, Pneumonia, COPD           | Smoking                                                  | Short breathing intervals, cold weather intensifies it, cough              | Western and herbs                                                                      |
| Asthma/COPD                           | Cold weather, holes in lungs                             | Difficulty in breathing                                                    | Traditional                                                                            |
| Asthma/lung infection                 | Weather conditions                                       | Difficulty in breathing during cold weather, persistent cough,             | Herbalists claim to cure it. Western because they are diagnosed from there             |
| Asthma/lung infection (respiratory)   | Heredity, being near fumes/charcoal, smoking cigarettes, | Difficulty in breathing because of Blocked nose, cold weather, chest pain, |                                                                                        |
| Asthma/lung infections                | Smoking cigarettes                                       | Difficulty in breathing                                                    |                                                                                        |

|          |                                                        |                                                                     |                                                                                                                                                |
|----------|--------------------------------------------------------|---------------------------------------------------------------------|------------------------------------------------------------------------------------------------------------------------------------------------|
| COPD     | Smoking                                                | Blocked throat, chest moves up and down, air shortage               | Traditional and western                                                                                                                        |
| COPD     | Smoking, alcohol, polluted environment                 |                                                                     |                                                                                                                                                |
| COPD     |                                                        | Flu                                                                 | Western                                                                                                                                        |
| COPD     | Cigarette smoking, alcohol and environmental pollution |                                                                     |                                                                                                                                                |
| COPD     | Smoking and alcohol taking                             | Hard breathing                                                      |                                                                                                                                                |
| COPD     | Smoking, drug abuse                                    |                                                                     |                                                                                                                                                |
| Diabetes |                                                        |                                                                     |                                                                                                                                                |
| Diabetes | A lot of sugar                                         | Paralysis, over sweating, burning fire sensation                    | Western medicine, herbs, crude waragi                                                                                                          |
| Diabetes | A lot of sugar                                         | Weight gain/loss, itchy feet                                        | Western and local                                                                                                                              |
| Diabetes | Sweet foods                                            | Paralysis                                                           | western                                                                                                                                        |
| Diabetes |                                                        |                                                                     |                                                                                                                                                |
| Diabetes | Taking a lot of sugar, alcohol,                        | Self injection, don't take sugar, paralysis of the legs, bad vision | Western,                                                                                                                                       |
| Diabetes | Diets, a lot of sugar,                                 | Frequent urination,                                                 | Western, herbs cure (hear that over the radio), mostly go to born again churches. Pray but it does not get cured.                              |
| Diabetes | Taking sugar,                                          | Taking less sugar,                                                  | Western, but because they get the same drugs every time they go the hospital and have been on medication for long, they decide to go for herbs |
| Diabetes |                                                        | Blurred vision, frequent urination, energy loss                     | Herbs have no side effects and are nutritious                                                                                                  |
| Diabetes | Taking too much sugar                                  | Feet swelling,                                                      | Western, spiritual,                                                                                                                            |
| Diabetes |                                                        | Sweating tiredness, cough, weight loss and gain                     |                                                                                                                                                |

|                                            |                                    |                                                                                                                      |                                                                                                                                                                                                              |
|--------------------------------------------|------------------------------------|----------------------------------------------------------------------------------------------------------------------|--------------------------------------------------------------------------------------------------------------------------------------------------------------------------------------------------------------|
| Diabetes                                   |                                    | Stroke, decolouring lips, skin darkening, dry skin, swollen feet, blisters which later turn into wounds, weight loss | Western and herbs but have to go there early before it becomes dangerous majority herbs, western, has many side effects                                                                                      |
| Diabetes                                   |                                    | Weight loss/gain, cracking body parts                                                                                |                                                                                                                                                                                                              |
| Diabetes                                   | From what we eat (sweet things)    | Frequent urination, over sweating, wounds that never heal, getting ill when one does not eat on time,                | Western, private and state, local treatment. These advertise over the radio how they cure diabetes, hypertension and heart failure, spiritual, this covers shrines, churches, combined with western medicine |
| Diabetes                                   | Legs paralysis, less sugar in take |                                                                                                                      |                                                                                                                                                                                                              |
| Diabetes                                   |                                    | Drinking a lot of water, self injection, less sugar in take,                                                         |                                                                                                                                                                                                              |
| diabetes                                   |                                    | Frequent urination                                                                                                   | western                                                                                                                                                                                                      |
| Diabetes (not common among the young ones) |                                    |                                                                                                                      |                                                                                                                                                                                                              |
| Diabetes (related to pressure)             | Taking sweet food                  |                                                                                                                      |                                                                                                                                                                                                              |
| Diabetes starts after 40 years             | Genetic                            |                                                                                                                      |                                                                                                                                                                                                              |
| Epilepsy                                   | God made, genetic                  | Seizures, close to fire                                                                                              | Tradition                                                                                                                                                                                                    |
| Epilepsy                                   | Genetic                            | Fits, seizures                                                                                                       | Herbal western does not treat it                                                                                                                                                                             |
| Epilepsy                                   | Genetic                            | Seizures, energy loss, confusion, mental confusion                                                                   | Western but herbs heal it                                                                                                                                                                                    |
| Epilepsy                                   | Witch craft                        | Seizures, mentally confused                                                                                          |                                                                                                                                                                                                              |
| Epilepsy                                   | Hereditary,                        | Seizures, convulsions, froth,                                                                                        | Western when they get attacks, nothing, spiritual.                                                                                                                                                           |
| Epilepsy                                   | Brain damage                       | Seizures, mental confusion, make noise before seizures,                                                              | Western, herbalist, prayers but God helps those who help themselves.                                                                                                                                         |
| Epilepsy                                   |                                    | Seizures,                                                                                                            |                                                                                                                                                                                                              |

|                                                                   |                                                       |                                                                                                             |                                                                   |
|-------------------------------------------------------------------|-------------------------------------------------------|-------------------------------------------------------------------------------------------------------------|-------------------------------------------------------------------|
| Epilepsy                                                          |                                                       | Seizures, fits                                                                                              |                                                                   |
| Epilepsy                                                          | Yaabwe, fever, witchcraft                             | Seizures and convulsions                                                                                    | Herbs cure it (spoon in the mouth and soda)                       |
| Epilepsy                                                          | Genetic, contact with saliva from an epileptic victim |                                                                                                             | Herbs before falling in fire                                      |
| epilepsy                                                          | Witchcraft, heredity,                                 | Seizures, mental confusion,                                                                                 | Western and traditional. Herbs cured it.                          |
| Epilepsy                                                          |                                                       | Dizziness, seizures and unconsciousness                                                                     | Local and western                                                 |
| Epilepsy                                                          | Don't know                                            | Seizures, space staring                                                                                     |                                                                   |
| Epilepsy                                                          | Genetic, witchcraft                                   | Seizures, walking, aimless, tiredness, cough                                                                | Spiritual (sheiks, pastors), western medication                   |
| Epilepsy                                                          |                                                       | Seizures, froths                                                                                            |                                                                   |
| Epilepsy                                                          |                                                       | Seizures                                                                                                    | Traditional                                                       |
| Epilepsy                                                          | Uncontrolled alcohol consumption, scars and bruises,  | Seizures, mental confusion, convulsions, body weakness, froths,                                             | Western but does not cure it. Parents have no way to take them    |
| Epilepsy                                                          | Heredity, spirits being unhappy,                      | Seizures, frothing,                                                                                         |                                                                   |
| Epilepsy                                                          | Brain failure to work properly,                       | Seizures,                                                                                                   |                                                                   |
| epilepsy                                                          | Hereditary,                                           | Seizures, mental confusion                                                                                  | Western,                                                          |
| Heart failure                                                     | Genetic, worries                                      |                                                                                                             |                                                                   |
| Heart failure                                                     | Don't know                                            |                                                                                                             | Western                                                           |
| Heart failure                                                     | Don't know                                            |                                                                                                             |                                                                   |
| Heart failure (related to pressure because all affect the heart.) |                                                       | Struggles to breath                                                                                         |                                                                   |
| HIV                                                               | promiscuity                                           | Skin rash, herpes-zoster                                                                                    | Western medicine, churches for those still in denial              |
| HIV                                                               | Unprotected sex                                       | Weight loss, sores, loss of appetite, fever, vomiting, energy and blood loss, stroke, palpitations, anaemia | Cost of and out of stocks, western drugs lead people to use herbs |
| HIV                                                               | Unprotected sex                                       | Weight loss, sores, fever, skin, rash, hair loss/texture                                                    | Mostly western because you swallow once                           |

|          |                                                                                                             |                                                                                          |                                                    |
|----------|-------------------------------------------------------------------------------------------------------------|------------------------------------------------------------------------------------------|----------------------------------------------------|
| HIV      |                                                                                                             | Diarrhoea                                                                                |                                                    |
| HIV      | Un protected sex with an infected person, sharing sharp instruments,                                        | Cough, skin spots, general body weakness, coldness and fever                             | Western, spiritual but affects treatment adherence |
| HIV      | Sexual unprotected, sharing sharp instruments with infected individuals, blood transfusion unsafe           | Hair loss, herpes-zoster, skin rash, red lips                                            |                                                    |
| HIV      | Sexual unprotected, accidents                                                                               | Weight loss, hair loss, red lips, fever, skin rash                                       | Western                                            |
| HIV      | Sexual unprotected, blood transfusion, sharing sharp instruments                                            |                                                                                          | Western (doctors shout at patients) and local      |
| HIV      | Unprotected sex, alcohol (impaired decision making), panadol and aspirin deter detection of HIV when tested | Western, prayers and local                                                               |                                                    |
| HIV      | Sexual unprotected, accidents, sharing sharp objects unsterilized                                           | Herpes-zoster, red lips, weight loss, running stomach, appetite loss                     |                                                    |
| HIV      |                                                                                                             | Boils, strong cough, darkening and falling out nails, fever, red lips, weight loss, rash | western                                            |
| HIV/AIDS |                                                                                                             |                                                                                          | Western followed by prayers                        |
| HIV/AIDS | Unprotected sex with an infected person, witchcraft, accidents                                              | Red lips, skin rashes, fever, cancer                                                     | Western, spiritual (combine church and seers)      |
| HIV/AIDS | Carelessness, unfaithfulness, unprotected sex with an infected person, professional exposure e.g. midwives  | Red lips, skin rashes, hair loss, headache,                                              | Western, traditional,                              |
| HIV/AIDS |                                                                                                             | Sever cough, flue, daily taking of drugs, red lips, skin rash, herpes-zoster             | western                                            |
| HIV/AIDS | Sexual intercourse (unprotected)                                                                            |                                                                                          | Western                                            |

|                             |                                                                                |                                                                                            |                                                                             |
|-----------------------------|--------------------------------------------------------------------------------|--------------------------------------------------------------------------------------------|-----------------------------------------------------------------------------|
| HIV/AIDS                    | Unprotected sex, accidents, blood transfusion, sharing sharp instruments       | Rashes, weight loss, being ill all the time, hair loss,                                    | Western, local and spiritual. Born again claim to cure HIV/AIDS             |
| HIV/AIDS                    | Unprotected sex with an infected person, accidents,                            | Slim, weak,                                                                                |                                                                             |
| HIV/AIDS                    | Witchcraft, unprotected sex with an infected person, unfaithfulness            |                                                                                            | Western,                                                                    |
| HIV/AIDS                    | Girls fear pregnancy less than HIV, TB linked to HIV                           |                                                                                            |                                                                             |
| Hypertension/heart diseases | Being worried about debts, sacked from a job, frightened, extremely happiness, | High palpitations, collapse,                                                               | Western and local. Herbalists claim to cure pressure                        |
| Hypertension/heart failure  | Worrying,                                                                      | Over pumping of the heart, getting tired quickly, increased breathing rate, easily scared, | Western, traditional                                                        |
| Hypertension/heart failure  | Being worried, over thinking,                                                  |                                                                                            | western                                                                     |
| Hypertension/heart failure  | Worries, raw salt intake, unbalanced diet. Fat blocking blood flow,            | General body weakness, headache, difficulty in breathing,                                  | Western and local, ( before diagnosis used to do self medication)           |
| Hypertension/heart failure  | Obesity, obstructed blood flow,                                                | high pulse rate, don't want to be scared,                                                  |                                                                             |
| Hypertension/lung infection | Cigarette smoking                                                              |                                                                                            |                                                                             |
| Pressure                    | Black out, being frightened                                                    |                                                                                            | Local (onions& soda) western                                                |
| Pressure                    | Poverty-wealth, stress                                                         |                                                                                            |                                                                             |
| Pressure                    | Stress, unbalanced diet/ without greens                                        | Weight gain, collapse, hard breathing                                                      | Local because you can share with another suffering from a different disease |
| Pressure                    | Worries fees, food loans/debts, narrow veins                                   | Blurred vision, sweating, palpitations, general body weakness                              | Western ( drugs are available but health workers come late)                 |
| Pressure                    | Lack of physical exercise, old age                                             |                                                                                            | Western and local                                                           |

|                                             |                                                                          |                                                                                                                                  |                                                                                 |
|---------------------------------------------|--------------------------------------------------------------------------|----------------------------------------------------------------------------------------------------------------------------------|---------------------------------------------------------------------------------|
| Pressure                                    | Old age                                                                  | Increased breathing rate, dizziness (delayed to seek treatment because much work, wanted a 3 <sup>rd</sup> diagnosis to confirm) | No treatment because no pain as yet                                             |
| Pressure                                    |                                                                          | Tiredness, headache, feeling frightened, sweating                                                                                | Western prayers (Pastor advices to go 4 testing) herbs                          |
| Pressure                                    |                                                                          | Swollen legs                                                                                                                     | Stop taking salt and sugar, western, herbs, prayers                             |
| Pressure (COPD/lung illness, heart disease) | Worries, drug abuse, avoid frightening, collapse                         | Over sweating, swollen legs/arms, heat shortly after covering self, heavy breathing, being terrified, blurred vision, paralysis  | Western medication, private clinics over charge                                 |
| Pressure/ heart disease                     |                                                                          | Feeling scared, sickly, weight gain, palpitations                                                                                |                                                                                 |
| Pressure/heart disease                      |                                                                          | Over sweating, unconsciousness, collapse, headache, leg swelling                                                                 | Herbal (garlic vanilla seeds, and bitter...) western                            |
| Pressure/heart failure                      | Stress, worrying,                                                        | General body weakness, bad vision,                                                                                               | Western and traditional. Grade be always advised to take him the following day. |
| Pressure/heart failure                      | Worrying too much, eating raw salt, use of family planning,              | Over sweating, feel hot most of the time, high palpitations                                                                      | Western,                                                                        |
| Pressure/heart failure                      | Thinking hard                                                            | Stroke, unconsciousness, heart pains, feeling frightened, breathing fast                                                         | Western                                                                         |
| TB/ Asthma/lung infection                   | Exposing babies to cold weather, hereditary, marijuana/cigarette smoking | cough                                                                                                                            | Western, traditional medicines,                                                 |
| TB/Asthma                                   | Smoking which causes holes in the lungs                                  | Nose congestion, difficulty in breathing, flue during cold weather,                                                              | Western,                                                                        |
| TB/Asthma/lung infection                    | Cough when mouths are not covered, cold weather, smoking,                | Cough, chest pain, wearing many clothing, breathing difficulties,                                                                | Take long to heal, western                                                      |
